# Supplementary material
Source: PubMed Central journal article supplement (PMC5544265)
Supplement: pnas.1620734114.sapp.pdf [file pnas.1620734114.sapp.pdf]

## SUPPORTING INFORMATION APPENDIX

1  
2  
3  
4  
5  
6  
7  
8  
9  
10  
11  
12  
13  
14  
15  
16  
17  
18  
19  
20  
21  
22  
23  
24  
25

### **Methods**

#### **Data compilation**

All data used in analyses were compiled from existing, published datasets, described and referenced in full below.

#### **Phylogeny**

Comparative datasets were matched to a dated consensus phylogeny for 301 primate species (10kTrees version 3, using GenBank taxonomy (1)). Taxonomic mis-matches were resolved using the 10kTrees Translation Table and the IUCN Red List website (2).

All sample sizes provided below refer to those after matching species in the original datasets to those in the phylogeny. We do not include humans in any analyses.

#### **Brain volume and body mass**

Data on endocranial volume (ECV, in cubic centimeters) and body mass (in grams) originally from museum collections were obtained from (3). 88% of individuals used for ECV measurements were wild-caught, and comparison of species where measures of ECV were available from both wild and captive individuals suggested no strong and consistent differences in brain size estimates between these sources (3). Body mass estimates in this source were taken from a combination of museum specimens and

26 existing compilations, including both wild and captive individuals. To maximize sample  
27 size, here we selected data for all species where ‘species mean’ values were provided for  
28 ECV or body mass in the dataset (N=184 and 186 species respectively), rather than  
29 selecting any subset based on a minimum number of individual specimens per species  
30 (see (3)). These ECV and body mass data included values averaged across multiple  
31 males and females (for the majority of anthropoid species, for whom sexual size  
32 dimorphism is frequent), values averaged across multiple individuals of unknown sex  
33 and values from single individuals of either sex (for prosimians, where sexual size  
34 dimorphism is limited or absent) (3).

35

#### 36 Social learning and research effort

37

38 Measures of social learning and research effort were obtained from (4), via the  
39 DataDryad digital repository (5) (N=186 species with both data on social learning and  
40 research effort, after matching species to the phylogeny). To create a quantitative  
41 measure of social learning propensity across primate species, Reader et al. (4) used the  
42 ‘taxonomic counts’ (6, 7) approach, which estimates a species’ tendency to perform a  
43 particular behavior based on counts of reports of the relevant behavior identified in  
44 appropriate literature, controlling for species differences in research effort. Expanding  
45 upon a prior survey (8, 9), Reader et al. (4) performed a search of over 4000 articles  
46 published between 1925–2000, principally from four primate behavior journals  
47 (*Primates*, *American Journal of Primatology*, *Folia Primatologica*, and the *International*  
48 *Journal of Primatology*), though with additional searches of other relevant literature  
49 cited by publications that were located in the first round of search. Following the  
50 approach pioneered by Lefebvre et al. (7), keywords were used to classify instances of

51 social learning, defined as learning skills and acquiring information from others (e.g.:  
52 “social learning”, “social transmission”, “cultural transmission”, “traditional”,  
53 “teaching”, “imitation”, “protoculture”, “[goal] emulation”, “observational learning”,  
54 “learning from each other”, “culturally acquired”, “local enhancement”, “stimulus  
55 enhancement”, “socially mediated learning”) (4, 8, 9). For example, Hosey et al. (10)  
56 describe ring-tailed lemurs (*Lemur catta*) using their tails to access hard-to-reach  
57 water, using the phrases “almost certainly [...] social learning”, “stimulus enhancement”,  
58 and “imitation is also a possibility”; therefore this was counted as one report of social  
59 learning in *L. catta*. Thus, the judgment of whether a behavior pattern qualified as an  
60 instance of social learning was made by the author of the surveyed article. This  
61 approach minimizes subjective bias during the collation of the data (7, 8, 11), but leaves  
62 open the possibility of reporting biases in the original articles. As mentioned in previous  
63 work (4, 8, 11, 12) social learning may be particularly prone to reporting biases as the  
64 majority of the reports of social learning were observational, and social learning is  
65 difficult to identify without controlled experiments (13). Inter-observer reliability for  
66 the original survey of social learning was, however, high (index of concordance (14) =  
67 0.95; (8)). Despite its potential limitations, this approach allows for more naturalistic  
68 and ecologically valid quantitative behavioral measures, permitting large-scale  
69 comparative analyses across a far broader diversity of species than are possible using  
70 alternative approaches based solely on experimental tests (4, 6, 8, 11, 12, 15, 16).  
71 Further, compared to a common approach in comparative analyses in which cognitive  
72 and/or behavioral traits are inferred from proxies such as brain volume or dietary  
73 measures, the taxonomic counts approach offers a more direct measure of cognitive and  
74 behavioral traits (6, 7, 11).

75

76 For reports to be included in the behavioral database as distinct examples of social  
77 learning, they needed to be classified as unique behaviors (4, 12). The database was  
78 therefore screened for possible repeated examples, with reports in the same species,  
79 context, and involving the same food and substrate only counted once. For example,  
80 two reports in one species of socially learning to open dead branches to consume larvae  
81 would be counted only once, whereas one account of opening branches to consume  
82 larvae and another of opening branches to access fungi would be counted as two  
83 reports. Similarly, socially learning to dig soil to access larvae and to open branches to  
84 access larvae would count as two reports. These behavioral data thus provide a  
85 measure of the number of unique reports of social learning for each species, i.e. social  
86 learning richness, analogous for example to parasite richness, rather than data on the  
87 frequency of use or time spent on social learning (12). These data include reports of  
88 social learning mostly observed in the wild, but records from captivity are included, as  
89 well as those within the context of experimental manipulations and as a result of human  
90 intervention such as food provisioning (4, 8). However, in a previous analysis,  
91 associations between social learning and a measure of brain size ('executive brain ratio'  
92 – the relative size of the neocortex and striatum) did not differ when observations of  
93 social learning outside of naturalistic settings were excluded (8). Therefore, to  
94 maximize sample size, here we include all reports of social learning regardless of the  
95 context in which they were observed. Further details of how data were collated and  
96 discussion of the validation and utility of the approach are given in (4, 8, 11, 12).  
97 Examples came from varied behavioral contexts, most commonly within foraging  
98 behavior (~50% reports in the original survey (8, 9)), while others were reported for  
99 example in the context of communication, display, grooming and play.

100

101 Since species with a greater amount of research attention should have more reports of a  
102 given behavior simply due to an increased likelihood of observing it, behavioral  
103 measures based on the ‘taxonomic counts’ approach must account for species  
104 differences in research effort (4, 6–8, 11). Here, we required an estimate of research  
105 effort that provided sufficient data for the broad taxonomic scale of our analysis.  
106 Following recent comparative analyses (4, 15), we used the number of articles  
107 published per species in the *Zoological Record* (1993-2001; a total of 7288 articles) to  
108 estimate research effort, as these articles include primate behavioral research, but not  
109 biomedical studies, which are unlikely to be relevant for behavioral measures. Previous  
110 work has utilized and compared estimates of research effort derived from different  
111 publication types, finding similar results regardless of the estimate (4, 8), suggesting  
112 that results based on this dataset are robust to alternative estimates of research effort.

113

114 While we control statistically for broad-scale species differences in research effort, our  
115 social learning data may be additionally affected by reporting biases, such as an  
116 increased propensity to report social learning in particular taxa (4). We suspected that  
117 any such biases would be particularly impactful for the great apes (4), due to their  
118 phylogenetic proximity to our own species and their reputation for complex and socially  
119 learned behavior. Therefore, we re-ran all analyses removing the great apes, finding no  
120 major differences in our results (see below and main text). Further, previous  
121 comparative analyses using this dataset have found associations with other variables  
122 specific to social learning (socially transmitted parasite richness), which are not shared  
123 with other behavioral measures from the same dataset (innovation and extractive  
124 foraging, associated instead specifically with environmentally transmitted parasite  
125 richness) (12). This result is not expected if researcher biases common to various

126 'complex' behaviors strongly determined the distribution of these behavioral measures  
127 across species.

128

### 129 Life history traits and social group size

130

131 Data on social group size and life history traits were obtained from the PanTheria  
132 dataset (17). Social group size in this source is defined as the number of individuals  
133 spending the majority of their time together in a socially cohesive unit throughout a 24-  
134 hour cycle, in non-captive populations (N=187 species). Life history traits, including  
135 gestation length in days (N=140 species), weaning age in days (N=116), age of sexual  
136 maturity in days (N=107) and maximum longevity in months (N=120), and body mass  
137 in grams (N=222) include estimates from both wild and captive individuals. Here, as a  
138 measure of maternal investment, we summed gestation length and weaning age,  
139 following (18). To estimate reproductive lifespan, we subtracted age of sexual maturity  
140 from longevity, after converting longevity from months to days. For two species with  
141 ECV measures, but lacking body mass data in the Isler et al. (3) dataset, body mass was  
142 taken instead from PanTheria.

143

### 144 **Statistical analyses**

145

146 We investigated the associations between brain volume (here measured as ECV), social  
147 learning, group size and longevity in a series of multiple regression models (for all  
148 parameters reported in full for each model, see SI Appendix Tables). Outcome variables  
149 were always either brain volume or social learning. We analyzed brain volume both in  
150 absolute terms, and relative to body mass, by varying whether body mass was included

151 as a predictor variable. Where social learning was the outcome variable, the research  
152 effort measure from (4) was always included as a predictor to account for the effect of  
153 research effort on social learning richness. Body mass was also included in models of  
154 social learning and life history traits, to control for the well-established and potentially  
155 confounding association of slower life histories with larger body mass (e.g.(19)). For all  
156 models identifying either group size or life history traits as predictors of social learning,  
157 we re-ran analyses controlling for both absolute and relative brain volume (by including  
158 either brain volume or brain volume and body mass as additional predictors), to  
159 investigate whether group size and life history traits predict social learning  
160 independently of brain volume. Additionally, for all models including longevity as a  
161 predictor, we ran additional analyses replacing longevity with either juvenile period  
162 length (age of sexual maturity) or reproductive lifespan (juvenile period subtracted  
163 from longevity). This allowed us to investigate whether relationships between social  
164 learning and longevity, or brain volume and longevity, are driven by increases in  
165 juvenile period length or post-juvenile lifespan in particular, or both. Further, for all  
166 models identifying longevity, reproductive lifespan or juvenile period as a predictor of  
167 either social learning or brain volume, we re-ran models including maternal investment  
168 as an additional predictor, to account for the potentially confounding effect of maternal  
169 investment on brain volume and lifespan in mammals (18). To investigate whether  
170 group size and longevity independently predicted brain volume and social learning or  
171 whether either relationship was confounded by the other, we ran additional models in  
172 which both group size and longevity were included as predictors. Finally, to evaluate  
173 the possibility of a strong influence of great ape species on results, we repeated all  
174 analyses removing great ape species (*Pan troglodytes*, *Pan paniscus*, *Gorilla gorilla* and

175 *Pongo pygmaeus*), confirming that our key results were not contingent on this lineage  
176 (results with and without great apes are presented throughout SI Appendix Tables).

177

178 Due to the non-independence of species data points arising from their shared  
179 evolutionary history (20), here we used phylogenetic comparative statistical methods,  
180 based on the 10kTrees consensus phylogeny (1). Specifically, we used Bayesian  
181 phylogenetic generalized linear mixed models, which allow for both control for  
182 phylogenetic non-independence and for modeling non-Gaussian response variables,  
183 using the R package MCMCglmm (21). Here, phylogeny is treated as a random effect,  
184 with the proportion of residual variance attributable to phylogeny estimated using  
185 heritability ( $h^2$ ) as a measure of phylogenetic signal.  $h^2$  is equivalent to and interpreted  
186 in the same way as the parameter Pagel's  $\lambda$  in phylogenetic generalized least squares  
187 models, ranging from 0 to 1 indicating zero and maximum influence of phylogeny  
188 respectively, assuming an underlying Brownian motion model of evolutionary change in  
189 phenotypic traits (22, 23). For mean  $h^2$  values from posterior distributions and all  
190 model parameters reported in full, see SI Appendix Tables.

191

192 Where brain volume was the response variable, Gaussian models were used with all  
193 variables log-10 transformed to achieve approximate normality of distributions. For  
194 Gaussian models, we used default diffuse normal priors for the fixed effects with a mean  
195 of 0 and a large variance ( $10^{10}$ ), and inverse-Wishart priors for the phylogenetic and  
196 residual variance (with  $V=1$ ,  $\nu=0.002$ ), which corresponds to an inverse-gamma prior  
197 with shape and scale parameters of 0.001 (21, 24). Where social learning was the  
198 response variable, Gaussian models were not appropriate due to the highly-skewed  
199 distribution of this variable, typical of count data. Therefore, we used Poisson models, in

200 which only predictor variables were log-10 transformed, leaving social learning  
201 untransformed as the outcome variable. For Poisson models, we used the same priors  
202 for the fixed effects and residual variance as for the Gaussian models, but with a  
203 parameter-expanded prior ( $V = 1$ ,  $v = 1$ ,  $\alpha\mu = 0$ , and  $\alpha V = 25^2$ ) for the phylogenetic  
204 random effect (21), as used in (25), for example.

205

206 Following some previous analyses using the ‘taxonomic counts’ approach (e.g. (8),  
207 though unlike (4), for example), here we include species with zero observations of  
208 social learning. These species are still informative due to the inclusion of research effort  
209 in all social learning models – i.e. if a species has no reports of social learning despite a  
210 large amount of research effort, this suggests that the species has a very low propensity  
211 to use social learning (26). Though a large proportion of the species in the Reader et al.  
212 (4) dataset (~80%) have zero records of social learning, we did not use phylogenetic  
213 zero-inflated Poisson models as they often fail to converge (24), which we found was  
214 the case for our data. Using posterior predictive checks (see MCMCglmm course notes  
215 (24)) for a simple model in which social learning was predicted by only research effort  
216 as a fixed effect with phylogeny as a random effect, we found that the observed number  
217 of zeros in the data did not fall outside of the range of values predicted by a standard,  
218 non-zero inflated Poisson model, suggesting that these models are appropriate for our  
219 data without a zero-inflation term (24). Over-dispersion is dealt with automatically in  
220 MCMCglmm Poisson models (24).

221

222 All MCMC chains converged and performed adequately, as determined by visual  
223 inspection of posterior distributions and trace plots for all estimated parameters. All  
224 models were run for 2,200,000 iterations, thinning every 1000 iterations, with a ‘burn-

225 in' period of 200,000 iterations, and all models returned effective sample sizes of >1000  
226 for all parameters. From each model, we report the mean  $h^2$ , and mean  $\beta$  coefficient  
227 estimate from posterior distributions. To assess the strength of evidence for fixed  
228 effects, we use the % of posterior  $\beta$  estimates crossing zero in the direction opposite to  
229 predictions (here, all associations are predicted to be positive in direction). We expect  
230 posterior distributions for non-influential predictors to be centered on zero or  
231 overlapping substantially with zero, while posterior distributions shifted substantially  
232 away from zero in either a positive or negative direction indicate support for positive or  
233 negative associations with predictor variables, respectively. As a measure of model fit,  
234 we use a pseudo- $R^2$ , here estimated as the squared Pearson's correlation between fitted  
235 values and observed data, in order to provide a measure of model fit comparable across  
236 both Gaussian and Poisson models (27) .

237

238 Multi-collinearity can cause serious problems for parameter estimation in multiple  
239 regression analyses, common in analyses of biological datasets where predictor  
240 variables are often inter-correlated (28). We therefore calculated variance inflation  
241 factors (VIFs) using non-phylogenetic, frequentist generalized least squares (GLS)  
242 regression models, which reflect the extent to which variance in estimated coefficients  
243 for each predictor is inflated by collinearity of the predictors. Here, use of non-  
244 phylogenetic GLS models is conservative as associations between biological traits tend  
245 to be stronger in non-phylogenetic models (29). All analyses reported VIFs <5, far below  
246 the threshold (>10) suggested to indicate strong collinearity (28).

247

248

249

250

251 **TABLES**

252

253

254 **Table S1. Social learning and brain volume**

255

256 (i) social learning and absolute brain volume

257

| Sample             | N   | h <sup>2</sup> | Ps-R <sup>2</sup> | Parameter       | Mean $\beta$ | % $\beta$ |
|--------------------|-----|----------------|-------------------|-----------------|--------------|-----------|
| All species        | 150 | 0.36           | 0.61              | Brain volume    | 1.77         | 0.20      |
|                    |     |                |                   | Research effort | 3.38         | 0.00      |
| Without great apes | 146 | 0.45           | 0.61              | Brain volume    | 1.90         | 0.35      |
|                    |     |                |                   | Research effort | 3.33         | 0.00      |

258

259 (ii) social learning and relative brain volume

260

| Sample             | N   | h <sup>2</sup> | Ps-R <sup>2</sup> | Parameter       | Mean $\beta$ | % $\beta$ |
|--------------------|-----|----------------|-------------------|-----------------|--------------|-----------|
| All species        | 150 | 0.38           | 0.58              | Brain volume    | 1.46         | 3.05      |
|                    |     |                |                   | Body mass       | 0.27         | 25.00     |
|                    |     |                |                   | Research effort | 3.35         | 0.00      |
| Without great apes | 146 | 0.47           | 0.63              | Brain volume    | 1.56         | 3.00      |
|                    |     |                |                   | Body mass       | 0.32         | 19.25     |
|                    |     |                |                   | Research effort | 3.31         | 0.00      |

261

262 *Results of models predicting social learning from brain volume and research effort (i) without, and (ii) with*

263 *control for body mass. In all tables, N=N species, h<sup>2</sup>=heritability (phylogenetic signal), Ps-R<sup>2</sup>=pseudo-R<sup>2</sup>,*

264 *Parameter=fixed effects, mean  $\beta$ =mean  $\beta$  coefficient from posterior distribution, %  $\beta$  = percentage of  $\beta$*

265 *estimates crossing zero in the opposite direction to that predicted for each effect (here all associations are*

266 *predicted to be positive). Results for all models are shown for both the full sample of primate species (top*

267 *rows), and for analyses removing great ape species (bottom rows).*

268

269

270

271

272

273

274

275

276

277

278

279

280

281

282

283

284

285

286

287

288

289

290 Table S2A: social learning and longevity

291

292 (i) social learning and longevity

293

| Sample             | N   | h <sup>2</sup> | Ps-R <sup>2</sup> | Parameter       | Mean $\beta$ | % $\beta$ |
|--------------------|-----|----------------|-------------------|-----------------|--------------|-----------|
| All species        | 117 | 0.43           | 0.79              | Longevity       | 5.46         | 0.15      |
|                    |     |                |                   | Body mass       | 0.44         | 9.00      |
|                    |     |                |                   | Research effort | 3.10         | 0.00      |
| Without great apes | 113 | 0.40           | 0.50              | Longevity       | 5.33         | 0.10      |
|                    |     |                |                   | Body mass       | 0.59         | 4.45      |
|                    |     |                |                   | Research effort | 3.20         | 0.00      |

294

295 (ii) social learning and longevity, maternal investment

296

| Sample             | N  | h <sup>2</sup> | Ps-R <sup>2</sup> | Parameter       | Mean $\beta$ | % $\beta$ |
|--------------------|----|----------------|-------------------|-----------------|--------------|-----------|
| All species        | 87 | 0.43           | 0.84              | Longevity       | 4.38         | 2.30      |
|                    |    |                |                   | Mat. investment | 0.73         | 35.00     |
|                    |    |                |                   | Body mass       | 0.34         | 19.75     |
|                    |    |                |                   | Research effort | 3.28         | 0.00      |
| Without great apes | 83 | 0.42           | 0.42              | Longevity       | 4.18         | 2.35      |
|                    |    |                |                   | Mat. investment | 0.83         | 31.30     |
|                    |    |                |                   | Body mass       | 0.44         | 14.20     |
|                    |    |                |                   | Research effort | 3.43         | 0.00      |

297

298 (iii) social learning and longevity, absolute brain volume

299

| Sample             | N   | h <sup>2</sup> | Ps-R <sup>2</sup> | Parameter       | Mean $\beta$ | % $\beta$ |
|--------------------|-----|----------------|-------------------|-----------------|--------------|-----------|
| All species        | 111 | 0.39           | 0.80              | Longevity       | 5.17         | 0.45      |
|                    |     |                |                   | Brain volume    | 0.56         | 22.65     |
|                    |     |                |                   | Research effort | 3.14         | 0.00      |
| Without great apes | 107 | 0.39           | 0.66              | Longevity       | 4.46         | 1.50      |
|                    |     |                |                   | Brain volume    | 1.02         | 9.65      |
|                    |     |                |                   | Research effort | 3.30         | 0.00      |

300

301 (iv) social learning and longevity, relative brain volume

302

| Sample             | N   | h <sup>2</sup> | Ps-R <sup>2</sup> | Parameter       | Mean $\beta$ | % $\beta$ |
|--------------------|-----|----------------|-------------------|-----------------|--------------|-----------|
| All species        | 111 | 0.41           | 0.78              | Longevity       | 5.51         | 0.70      |
|                    |     |                |                   | Brain volume    | -0.01        | 51.30     |
|                    |     |                |                   | Body mass       | 0.44         | 14.35     |
|                    |     |                |                   | Research effort | 3.05         | 0.00      |
| Without great apes | 107 | 0.38           | 0.36              | Longevity       | 5.09         | 0.90      |
|                    |     |                |                   | Brain volume    | 0.37         | 34.05     |
|                    |     |                |                   | Body mass       | 0.49         | 10.35     |
|                    |     |                |                   | Research effort | 3.19         | 0.00      |

303

304 *Results of models predicting social learning from longevity, controlling for (i) body mass and research effort,*

305 *(ii) maternal investment, body mass and research effort, (iii) brain volume and research effort, (iv) brain*

306 *volume, body mass and research effort.*

307

308

309

310 Table S2B: social learning and juvenile period

311

312 (i) social learning and juvenile period

313

| Sample             | N   | h <sup>2</sup> | Ps-R <sup>2</sup> | Parameter       | Mean $\beta$ | % $\beta$ |
|--------------------|-----|----------------|-------------------|-----------------|--------------|-----------|
| All species        | 101 | 0.39           | 0.70              | Juvenile period | -0.22        | 57.65     |
|                    |     |                |                   | Body mass       | 0.62         | 5.40      |
|                    |     |                |                   | Research effort | 4.00         | 0.00      |
| Without great apes | 97  | 0.51           | 0.63              | Juvenile period | -0.33        | 56.55     |
|                    |     |                |                   | Body mass       | 0.64         | 5.85      |
|                    |     |                |                   | Research effort | 3.89         | 0.00      |

314

315 *Results of models predicting social learning from juvenile period, controlling for (i) body mass and research*  
 316 *effort. As juvenile period failed to predict social learning in this model, no further analyses with additional*  
 317 *potentially confounding variables are included.*

318

319

320 Table S2C: social learning and reproductive lifespan

321

322 (i) social learning and reproductive lifespan

323

| Sample             | N  | h <sup>2</sup> | Ps-R <sup>2</sup> | Parameter       | Mean $\beta$ | % $\beta$ |
|--------------------|----|----------------|-------------------|-----------------|--------------|-----------|
| All species        | 92 | 0.40           | 0.75              | Rep. lifespan   | 6.09         | 0.00      |
|                    |    |                |                   | Body mass       | 0.29         | 18.75     |
|                    |    |                |                   | Research effort | 3.14         | 0.00      |
| Without great apes | 88 | 0.40           | 0.51              | Rep. lifespan   | 5.71         | 0.00      |
|                    |    |                |                   | Body mass       | 0.43         | 9.80      |
|                    |    |                |                   | Research effort | 3.23         | 0.00      |

324

325 (ii) social learning and reproductive lifespan, maternal investment

326

| Sample             | N  | h <sup>2</sup> | Ps-R <sup>2</sup> | Parameter       | Mean $\beta$ | % $\beta$ |
|--------------------|----|----------------|-------------------|-----------------|--------------|-----------|
| All species        | 82 | 0.44           | 0.89              | Rep. lifespan   | 6.04         | 0.05      |
|                    |    |                |                   | Mat. investment | 0.42         | 40.60     |
|                    |    |                |                   | Body mass       | 0.27         | 23.10     |
|                    |    |                |                   | Research effort | 3.14         | 0.00      |
| Without great apes | 78 | 0.46           | 0.50              | Rep. lifespan   | 5.71         | 0.10      |
|                    |    |                |                   | Mat. investment | 0.48         | 39.00     |
|                    |    |                |                   | Body mass       | 0.40         | 15.30     |
|                    |    |                |                   | Research effort | 3.26         | 0.00      |

327

328 (iii) social learning and reproductive lifespan, absolute brain volume

329

| Sample             | N  | h <sup>2</sup> | Ps-R <sup>2</sup> | Parameter       | Mean $\beta$ | % $\beta$ |
|--------------------|----|----------------|-------------------|-----------------|--------------|-----------|
| All species        | 89 | 0.38           | 0.78              | Rep. lifespan   | 5.98         | 0.20      |
|                    |    |                |                   | Brain volume    | 0.31         | 32.80     |
|                    |    |                |                   | Research effort | 3.16         | 0.00      |
| Without great apes | 85 | 0.39           | 0.42              | Rep. lifespan   | 5.18         | 0.40      |
|                    |    |                |                   | Brain volume    | 0.74         | 15.65     |
|                    |    |                |                   | Research effort | 3.32         | 0.00      |

330

331

332 (iv) social learning and reproductive lifespan, relative brain volume

333

| Sample             | N  | h <sup>2</sup> | Ps-R <sup>2</sup> | Parameter       | Mean $\beta$ | % $\beta$ |
|--------------------|----|----------------|-------------------|-----------------|--------------|-----------|
| All species        | 89 | 0.39           | 0.80              | Rep. lifespan   | 6.37         | 0.05      |
|                    |    |                |                   | Brain volume    | -0.10        | 54.75     |
|                    |    |                |                   | Body mass       | 0.32         | 21.65     |
|                    |    |                |                   | Research effort | 3.05         | 0.00      |
| Without great apes | 85 | 0.43           | 0.50              | Rep. lifespan   | 5.62         | 0.20      |
|                    |    |                |                   | Brain volume    | 0.31         | 35.45     |
|                    |    |                |                   | Body mass       | 0.39         | 16.75     |
|                    |    |                |                   | Research effort | 3.18         | 0.00      |

334

335 *Results of models predicting social learning from reproductive lifespan, controlling for (i) body mass and*

336 *research effort, (ii) maternal investment, body mass and research effort, (iii) brain volume and research*

337 *effort, (iv) brain volume, body mass and research effort.*

338

339

340

341 Table S3: social learning and group size

342

343 (i) social learning and group size

344

| Sample             | N   | h <sup>2</sup> | Ps-R <sup>2</sup> | Parameter       | Mean $\beta$ | % $\beta$ |
|--------------------|-----|----------------|-------------------|-----------------|--------------|-----------|
| All species        | 167 | 0.31           | 0.84              | Group size      | 1.32         | 0.80      |
|                    |     |                |                   | Research effort | 3.96         | 0.00      |
| Without great apes | 163 | 0.44           | 0.63              | Group size      | 2.40         | 0.00      |
|                    |     |                |                   | Research effort | 3.32         | 0.00      |

345

346 (ii.a) social learning, group size and longevity

347

| Sample             | N   | h <sup>2</sup> | Ps-R <sup>2</sup> | Parameter       | Mean $\beta$ | % $\beta$ |
|--------------------|-----|----------------|-------------------|-----------------|--------------|-----------|
| All species        | 111 | 0.36           | 0.84              | Longevity       | 4.72         | 0.30      |
|                    |     |                |                   | Group size      | 0.91         | 3.70      |
|                    |     |                |                   | Body mass       | 0.22         | 26.65     |
|                    |     |                |                   | Research effort | 3.48         | 0.00      |
| Without great apes | 107 | 0.39           | 0.59              | Longevity       | 3.69         | 1.75      |
|                    |     |                |                   | Group size      | 2.09         | 0.05      |
|                    |     |                |                   | Body mass       | 0.05         | 45.00     |
|                    |     |                |                   | Research effort | 3.37         | 0.00      |

348

349 (ii.b) social learning, group size and reproductive lifespan

350

| Sample             | N  | h <sup>2</sup> | Ps-R <sup>2</sup> | Parameter       | Mean $\beta$ | % $\beta$ |
|--------------------|----|----------------|-------------------|-----------------|--------------|-----------|
| All species        | 89 | 0.40           | 0.85              | Rep. lifespan   | 6.11         | 0.05      |
|                    |    |                |                   | Group size      | 0.81         | 4.80      |
|                    |    |                |                   | Body mass       | 0.19         | 29.15     |
|                    |    |                |                   | Research effort | 3.18         | 0.00      |
| Without great apes | 85 | 0.48           | 0.39              | Rep. lifespan   | 4.81         | 0.15      |
|                    |    |                |                   | Group size      | 1.88         | 0.50      |
|                    |    |                |                   | Body mass       | 0.07         | 43.45     |
|                    |    |                |                   | Research effort | 3.09         | 0.00      |

351

352 (iii) social learning, group size and absolute brain volume

353

| Sample             | N   | h <sup>2</sup> | Ps-R <sup>2</sup> | Parameter       | Mean $\beta$ | % $\beta$ |
|--------------------|-----|----------------|-------------------|-----------------|--------------|-----------|
| All species        | 140 | 0.32           | 0.80              | Group size      | 0.93         | 3.75      |
|                    |     |                |                   | Brain volume    | 1.34         | 1.55      |
|                    |     |                |                   | Research effort | 3.56         | 0.00      |
| Without great apes | 136 | 0.46           | 0.62              | Group size      | 2.37         | 0.15      |
|                    |     |                |                   | Brain volume    | 0.51         | 25.50     |
|                    |     |                |                   | Research effort | 3.18         | 0.00      |

354

355 (iv) social learning, group size and relative brain volume

356

| Sample             | N   | h <sup>2</sup> | Ps-R <sup>2</sup> | Parameter       | Mean $\beta$ | % $\beta$ |
|--------------------|-----|----------------|-------------------|-----------------|--------------|-----------|
| All species        | 140 | 0.33           | 0.71              | Group size      | 0.95         | 3.25      |
|                    |     |                |                   | Brain volume    | 1.17         | 7.05      |
|                    |     |                |                   | Body mass       | 0.15         | 35.90     |
|                    |     |                |                   | Research effort | 3.56         | 0.00      |
| Without great apes | 136 | 0.48           | 0.44              | Group size      | 2.45         | 0.15      |
|                    |     |                |                   | Brain volume    | 0.51         | 27.70     |
|                    |     |                |                   | Body mass       | 0.00         | 51.25     |
|                    |     |                |                   | Research effort | 3.20         | 0.00      |

357

358 *Results of models predicting social learning from group size, controlling for (i) research effort only, (ii.a)*

359 *longevity, body mass and research effort, (ii.b) reproductive lifespan, body mass and research effort, (iii)*

360 *brain volume and research effort, (iv) brain volume, body mass and research effort.*

361

362

363

364

365

366

367

368 Table S4. Predictors of absolute brain volume

369

370 (i) absolute brain volume and group size

371

| Sample             | N   | h <sup>2</sup> | Ps-R <sup>2</sup> | Parameter  | Mean $\beta$ | % $\beta$ |
|--------------------|-----|----------------|-------------------|------------|--------------|-----------|
| All species        | 151 | 1.00           | 0.48              | Group size | 0.07         | 3.45      |
| Without great apes | 147 | 0.99           | 0.53              | Group size | 0.09         | 1.65      |

372

373 (ii.a) absolute brain volume and longevity

374

| Sample             | N   | h <sup>2</sup> | Ps-R <sup>2</sup> | Parameter | Mean $\beta$ | % $\beta$ |
|--------------------|-----|----------------|-------------------|-----------|--------------|-----------|
| All species        | 112 | 1.00           | 0.56              | Longevity | 0.36         | 0.05      |
| Without great apes | 108 | 1.00           | 0.50              | Longevity | 0.31         | 0.30      |

375

376 (ii.b) absolute brain volume and juvenile period

377

| Sample             | N  | h <sup>2</sup> | Ps-R <sup>2</sup> | Parameter       | Mean $\beta$ | % $\beta$ |
|--------------------|----|----------------|-------------------|-----------------|--------------|-----------|
| All species        | 98 | 0.99           | 0.83              | Juvenile period | 0.49         | 0.00      |
| Without great apes | 94 | 0.99           | 0.80              | Juvenile period | 0.48         | 0.00      |

378 (ii.c) absolute brain volume and reproductive lifespan

379

| <b>Sample</b>      | <b>N</b> | <b>h<sup>2</sup></b> | <b>Ps-R<sup>2</sup></b> | <b>Parameter</b> | <b>Mean <math>\beta</math></b> | <b>% <math>\beta</math></b> |
|--------------------|----------|----------------------|-------------------------|------------------|--------------------------------|-----------------------------|
| All species        | 90       | 0.99                 | 0.47                    | Rep. lifespan    | 0.39                           | 0.15                        |
| Without great apes | 86       | 0.99                 | 0.41                    | Rep. lifespan    | 0.36                           | 0.25                        |

380

381 (iii.a) absolute brain volume, longevity and maternal investment

382

| <b>Sample</b>      | <b>N</b> | <b>h<sup>2</sup></b> | <b>Ps-R<sup>2</sup></b> | <b>Parameter</b> | <b>Mean <math>\beta</math></b> | <b>% <math>\beta</math></b> |
|--------------------|----------|----------------------|-------------------------|------------------|--------------------------------|-----------------------------|
| All species        | 84       | 0.98                 | 0.84                    | Longevity        | 0.41                           | 0.45                        |
|                    |          |                      |                         | Mat. investment  | 0.69                           | 0.00                        |
| Without great apes | 80       | 0.99                 | 0.82                    | Longevity        | 0.38                           | 0.75                        |
|                    |          |                      |                         | Mat. investment  | 0.65                           | 0.00                        |

383

384 (iii.b) absolute brain volume, juvenile period and maternal investment

385

| <b>Sample</b>      | <b>N</b> | <b>h<sup>2</sup></b> | <b>Ps-R<sup>2</sup></b> | <b>Parameter</b> | <b>Mean <math>\beta</math></b> | <b>% <math>\beta</math></b> |
|--------------------|----------|----------------------|-------------------------|------------------|--------------------------------|-----------------------------|
| All species        | 86       | 0.98                 | 0.85                    | Juvenile period  | 0.43                           | 0.20                        |
|                    |          |                      |                         | Mat. investment  | 0.62                           | 0.00                        |
| Without great apes | 82       | 0.98                 | 0.83                    | Juvenile period  | 0.43                           | 0.25                        |
|                    |          |                      |                         | Mat. investment  | 0.56                           | 0.00                        |

386

387 (iii.c) absolute brain volume, reproductive lifespan and maternal investment

388

| <b>Sample</b>      | <b>N</b> | <b>h<sup>2</sup></b> | <b>Ps-R<sup>2</sup></b> | <b>Parameter</b> | <b>Mean <math>\beta</math></b> | <b>% <math>\beta</math></b> |
|--------------------|----------|----------------------|-------------------------|------------------|--------------------------------|-----------------------------|
| All species        | 79       | 0.98                 | 0.82                    | Rep. lifespan    | 0.37                           | 0.25                        |
|                    |          |                      |                         | Mat. investment  | 0.70                           | 0.00                        |
| Without great apes | 75       | 0.98                 | 0.79                    | Rep. lifespan    | 0.34                           | 0.95                        |
|                    |          |                      |                         | Mat. investment  | 0.66                           | 0.00                        |

389

390 (iv.a) absolute brain volume, group size and longevity

391

| <b>Sample</b>      | <b>N</b> | <b>h<sup>2</sup></b> | <b>Ps-R<sup>2</sup></b> | <b>Parameter</b> | <b>Mean <math>\beta</math></b> | <b>% <math>\beta</math></b> |
|--------------------|----------|----------------------|-------------------------|------------------|--------------------------------|-----------------------------|
| All species        | 106      | 0.99                 | 0.69                    | Group size       | 0.06                           | 9.25                        |
|                    |          |                      |                         | Longevity        | 0.40                           | 0.05                        |
| Without great apes | 102      | 0.99                 | 0.69                    | Group size       | 0.09                           | 4.50                        |
|                    |          |                      |                         | Longevity        | 0.34                           | 0.45                        |

392

393 (iv.b) absolute brain volume, group size and juvenile period

394

| <b>Sample</b>      | <b>N</b> | <b>h<sup>2</sup></b> | <b>Ps-R<sup>2</sup></b> | <b>Parameter</b> | <b>Mean <math>\beta</math></b> | <b>% <math>\beta</math></b> |
|--------------------|----------|----------------------|-------------------------|------------------|--------------------------------|-----------------------------|
| All species        | 95       | 0.99                 | 0.85                    | Group size       | 0.12                           | 0.95                        |
|                    |          |                      |                         | Juvenile period  | 0.54                           | 0.00                        |
| Without great apes | 91       | 0.99                 | 0.85                    | Group size       | 0.17                           | 0.10                        |
|                    |          |                      |                         | Juvenile period  | 0.57                           | 0.00                        |

395

396

397

398

399

400

401 (iv.c) absolute brain volume, group size and reproductive lifespan

402

| Sample             | N  | h <sup>2</sup> | Ps-R <sup>2</sup> | Parameter     | Mean $\beta$ | % $\beta$ |
|--------------------|----|----------------|-------------------|---------------|--------------|-----------|
| All species        | 87 | 0.99           | 0.62              | Group size    | 0.08         | 6.65      |
|                    |    |                |                   | Rep. lifespan | 0.44         | 0.00      |
| Without great apes | 83 | 0.99           | 0.62              | Group size    | 0.10         | 4.05      |
|                    |    |                |                   | Rep. lifespan | 0.38         | 0.55      |

403

404 *Results of models predicting absolute brain volume from (i) group size, (ii.a) longevity, (ii.b) juvenile period,*

405 *(ii.c) reproductive lifespan, (iii.a) longevity, controlling for maternal investment, (iii.b) juvenile period,*

406 *controlling for maternal investment, (iii.c) reproductive lifespan, controlling for maternal investment, (iv.a)*

407 *group size and longevity, (iv.b) group size and juvenile period, (iv.c) group size and reproductive lifespan.*

408

409

410

411 Table S5. Predictors of relative brain volume

412

413 (i) relative brain volume and group size

414

| Sample             | N   | h <sup>2</sup> | Ps-R <sup>2</sup> | Parameter  | Mean $\beta$ | % $\beta$ |
|--------------------|-----|----------------|-------------------|------------|--------------|-----------|
| All species        | 151 | 0.99           | 0.69              | Group size | 0.07         | 3.65      |
|                    |     |                |                   | Body mass  | 0.04         | 0.10      |
| Without great apes | 147 | 0.99           | 0.69              | Group size | 0.08         | 2.45      |
|                    |     |                |                   | Body mass  | 0.04         | 0.75      |

415

416 (ii.a) relative brain volume and longevity

417

| Sample             | N   | h <sup>2</sup> | Ps-R <sup>2</sup> | Parameter | Mean $\beta$ | % $\beta$ |
|--------------------|-----|----------------|-------------------|-----------|--------------|-----------|
| All species        | 112 | 0.99           | 0.75              | Longevity | 0.37         | 0.00      |
|                    |     |                |                   | Body mass | 0.07         | 0.00      |
| Without great apes | 108 | 0.99           | 0.71              | Longevity | 0.33         | 0.15      |
|                    |     |                |                   | Body mass | 0.06         | 0.15      |

418

419 (ii.b) relative brain volume and juvenile period

420

| Sample             | N  | h <sup>2</sup> | Ps-R <sup>2</sup> | Parameter       | Mean $\beta$ | % $\beta$ |
|--------------------|----|----------------|-------------------|-----------------|--------------|-----------|
| All species        | 98 | 0.99           | 0.87              | Juvenile period | 0.55         | 0.00      |
|                    |    |                |                   | Body mass       | 0.10         | 0.00      |
| Without great apes | 94 | 0.99           | 0.86              | Juvenile period | 0.55         | 0.00      |
|                    |    |                |                   | Body mass       | 0.09         | 0.00      |

421

422 (ii.c) relative brain volume and reproductive lifespan

423

| Sample             | N  | h <sup>2</sup> | Ps-R <sup>2</sup> | Parameter     | Mean $\beta$ | % $\beta$ |
|--------------------|----|----------------|-------------------|---------------|--------------|-----------|
| All species        | 90 | 0.99           | 0.68              | Rep. lifespan | 0.36         | 0.20      |
|                    |    |                |                   | Body mass     | 0.08         | 0.05      |
| Without great apes | 86 | 0.99           | 0.63              | Rep. lifespan | 0.34         | 0.50      |
|                    |    |                |                   | Body mass     | 0.07         | 0.40      |

424

425

426

427 (iii.a) relative brain volume, longevity and maternal investment

428

| Sample             | N  | h <sup>2</sup> | Ps-R <sup>2</sup> | Parameter       | Mean $\beta$ | % $\beta$ |
|--------------------|----|----------------|-------------------|-----------------|--------------|-----------|
| All species        | 84 | 0.98           | 0.88              | Longevity       | 0.42         | 0.20      |
|                    |    |                |                   | Body mass       | 0.07         | 0.25      |
|                    |    |                |                   | Mat. investment | 0.63         | 0.00      |
| Without great apes | 80 | 0.98           | 0.86              | Longevity       | 0.39         | 0.35      |
|                    |    |                |                   | Body mass       | 0.03         | 0.60      |
|                    |    |                |                   | Mat. investment | 0.67         | 0.00      |

429

430 (iii.b) relative brain volume, juvenile period and maternal investment

431

| Sample             | N  | h <sup>2</sup> | Ps-R <sup>2</sup> | Parameter       | Mean $\beta$ | % $\beta$ |
|--------------------|----|----------------|-------------------|-----------------|--------------|-----------|
| All species        | 86 | 0.98           | 0.89              | Juvenile period | 0.46         | 0.05      |
|                    |    |                |                   | Body mass       | 0.04         | 0.00      |
|                    |    |                |                   | Mat. investment | 0.52         | 0.05      |
| Without great apes | 82 | 0.98           | 0.88              | Juvenile period | 0.47         | 0.05      |
|                    |    |                |                   | Body mass       | 0.03         | 0.10      |
|                    |    |                |                   | Mat. investment | 0.49         | 0.00      |

432

433 (iii.c) relative brain volume, reproductive lifespan and maternal investment

434

| Sample             | N  | h <sup>2</sup> | Ps-R <sup>2</sup> | Parameter       | Mean $\beta$ | % $\beta$ |
|--------------------|----|----------------|-------------------|-----------------|--------------|-----------|
| All species        | 79 | 0.98           | 0.86              | Rep. lifespan   | 0.35         | 0.50      |
|                    |    |                |                   | Body mass       | 0.03         | 0.10      |
|                    |    |                |                   | Mat. investment | 0.63         | 0.00      |
| Without great apes | 75 | 0.98           | 0.84              | Rep. lifespan   | 0.33         | 0.85      |
|                    |    |                |                   | Body mass       | 0.03         | 0.30      |
|                    |    |                |                   | Mat. investment | 0.61         | 0.00      |

435

436 (iv.a) relative brain volume, group size and longevity

437

| Sample             | N   | h <sup>2</sup> | Ps-R <sup>2</sup> | Parameter  | Mean $\beta$ | % $\beta$ |
|--------------------|-----|----------------|-------------------|------------|--------------|-----------|
| All species        | 106 | 0.99           | 0.79              | Group size | 0.05         | 15.45     |
|                    |     |                |                   | Longevity  | 0.42         | 0.05      |
|                    |     |                |                   | Body mass  | 0.07         | 0.20      |
| Without great apes | 102 | 0.99           | 0.77              | Group size | 0.07         | 9.45      |
|                    |     |                |                   | Longevity  | 0.36         | 0.20      |
|                    |     |                |                   | Body mass  | 0.06         | 0.50      |

438

439 (iv.b) relative brain volume, group size and juvenile period

440

| Sample             | N  | h <sup>2</sup> | Ps-R <sup>2</sup> | Parameter       | Mean $\beta$ | % $\beta$ |
|--------------------|----|----------------|-------------------|-----------------|--------------|-----------|
| All species        | 95 | 0.98           | 0.89              | Group size      | 0.10         | 2.60      |
|                    |    |                |                   | Juvenile period | 0.59         | 0.00      |
|                    |    |                |                   | Body mass       | 0.10         | 0.00      |
| Without great apes | 91 | 0.98           | 0.88              | Group size      | 0.14         | 0.50      |
|                    |    |                |                   | Juvenile period | 0.61         | 0.00      |
|                    |    |                |                   | Body mass       | 0.08         | 0.05      |

441

442

443 (iv.c) relative brain volume, group size and reproductive lifespan

444

| <b>Sample</b>      | <b>N</b> | <b>h<sup>2</sup></b> | <b>Ps-R<sup>2</sup></b> | <b>Parameter</b> | <b>Mean <math>\beta</math></b> | <b>% <math>\beta</math></b> |
|--------------------|----------|----------------------|-------------------------|------------------|--------------------------------|-----------------------------|
| All species        | 87       | 0.99                 | 0.73                    | Group size       | 0.06                           | 12.75                       |
|                    |          |                      |                         | Rep. lifespan    | 0.40                           | 0.10                        |
|                    |          |                      |                         | Body mass        | 0.07                           | 0.20                        |
| Without great apes | 83       | 0.99                 | 0.71                    | Group size       | 0.08                           | 7.55                        |
|                    |          |                      |                         | Rep. lifespan    | 0.36                           | 0.60                        |
|                    |          |                      |                         | Body mass        | 0.06                           | 1.05                        |

445

446 *Results of models predicting relative brain volume from (i) group size, (ii.a) longevity, (ii.b) juvenile period,*

447 *(ii.c) reproductive lifespan, (iii.a) longevity, controlling for maternal investment, (iii.b) juvenile period,*

448 *controlling for maternal investment, (iii.c) reproductive lifespan, controlling for maternal investment and*

449 *(iv.a) group size and longevity, (iv.b) group size and juvenile period, (iv.c) group size and reproductive*

450 *lifespan.*

451

452

453

454

455

456

457

458

459

460

461

462

463

464

465

466

467

468

469

470 **SI APPENDIX REFERENCES**

471

- 472 1. Arnold C, Matthews LJ, Nunn CL (2010) The 10kTrees Website: A new online  
473 resource for primate phylogeny. *Evol Anthropol* 19:114–118.
- 474 2. IUCN (2016) *The IUCN Red List of Threatened Species*. Version 2016-2. Available at:  
475 <http://www.iucnredlist.org>. Accessed November 24, 2016
- 476 3. Isler K, et al. (2008) Endocranial volumes of primate species: scaling analyses using a  
477 comprehensive and reliable data set. *J Hum Evol* 55:967–978.
- 478 4. Reader SM, Hager Y, Laland KN (2011) The evolution of primate general and cultural  
479 intelligence. *Philos Trans R Soc Lond B Biol Sci* 366:1017–1027.
- 480 5. Reader SM, Hager Y, Laland KN (2011) Data from: The evolution of primate general  
481 and cultural intelligence. Dryad Digit Repository. Available at:  
482 <http://dx.doi.org/10.5061/dryad.t0q94>. Accessed November 23, 2016
- 483 6. Lefebvre L (2011) Taxonomic counts of cognition in the wild. *Biol Lett* 7:631–3.
- 484 7. Lefebvre L, Whittle P, Lascaris E, Finkelstein A (1997) Feeding innovations and  
485 forebrain size in birds. *Anim Behav* 53:549–560.
- 486 8. Reader SM, Laland KN (2002) Social intelligence, innovation, and enhanced brain  
487 size in primates. *Proc Natl Acad Sci USA* 99:4436–4441.
- 488 9. Reader SM (2000) Social learning and innovation: individual differences, diffusion  
489 dynamics and evolutionary issues. PhD dissertation (University of Cambridge,  
490 Cambridge, UK).
- 491 10. Hosey GR, Jacques M, Pitts A (1997) Drinking from tails: Social learning of a novel  
492 behaviour in a group of ring-tailed lemurs (*Lemur catta*). *Primates* 38:415–422.
- 493 11. Lefebvre L, Reader SM, Sol D (2004) Brains, innovations and evolution in birds and  
494 primates. *Brain Behav Evol* 63:233–246.
- 495 12. McCabe CM, Reader SM, Nunn CL (2015) Infectious disease, behavioural flexibility  
496 and the evolution of culture in primates. *Proc Biol Sci* 282:20140862.
- 497 13. Reader SM, Biro D (2010) Experimental identification of social learning in wild  
498 animals. *Learn Behav* 38:265–283.
- 499 14. Martin P, Bateson P (1986) *Measuring Behaviour: An Introductory Guide* (Cambridge  
500 University Press, Cambridge).
- 501 15. Navarrete AF, Reader SM, Street SE, Whalen A, Laland KN (2016) The coevolution  
502 of innovation and technical intelligence in primates. *Philos Trans R Soc Lond B Biol  
503 Sci* 371:20150186.
- 504 16. Bates LA, Byrne RW (2007) Creative or created: Using anecdotes to investigate  
505 animal cognition. *Methods* 42:12–21.
- 506 17. Jones KE, et al. (2009) PanTHERIA: a species-level database of life history, ecology,  
507 and geography of extant and recently extinct mammals. *Ecology* 90:2648.
- 508 18. Barton RA, Capellini I (2011) Maternal investment, life histories, and the costs of  
509 brain growth in mammals. *Proc Natl Acad Sci USA* 108:6169–6174.
- 510 19. West HER, Capellini I (2016) Male care and life history traits in mammals. *Nat  
511 Commun* 7:11854.
- 512 20. Harvey PH, Pagel MD (1991) *The Comparative Method in Evolutionary Biology*  
513 (Oxford University Press, Oxford).
- 514 21. Hadfield JD (2010) MCMC methods for multi-response generalized linear mixed  
515 models: The MCMCglmm R package. *J Stat Softw* 33:1–22.
- 516 22. Freckleton RP, Harvey PH, Pagel M (2002) Phylogenetic analysis and comparative  
517 data: A test and review of evidence. *Am Nat* 160:712–726.
- 518 23. Hadfield JD, Nakagawa S (2010) General quantitative genetic methods for

519 comparative biology: phylogenies, taxonomies and multi-trait models for continuous  
520 and categorical characters. *J Evol Biol* 23:494–508.

521 24. Hadfield J (2016) MCMCglmm course notes. Available at: [ftp://cran.r-](ftp://cran.r-project.org/pub/R/web/packages/MCMCglmm/vignettes/CourseNotes.pdf)  
522 [project.org/pub/R/web/packages/MCMCglmm/vignettes/CourseNotes.pdf](ftp://cran.r-project.org/pub/R/web/packages/MCMCglmm/vignettes/CourseNotes.pdf). Accessed  
523 January 5, 2017

524 25. Sakamoto M, Benton MJ, Venditti C (2016) Dinosaurs in decline tens of millions of  
525 years before their final extinction. *Proc Natl Acad Sci USA* 113:5036–5040.

526 26. Reader SM, MacDonald K (2003) Environmental variability and primate behavioural  
527 flexibility. *Animal Innovation*, eds Reader SM, Laland KN (Oxford University Press,  
528 Oxford), pp 83–116.

529 27. Zheng B, Agresti A (2000) Summarizing the predictive power of a generalized linear  
530 model. *Stat Med* 19:1771–1781.

531 28. Quinn G, Keough M (2007) *Experimental Design and Data Analysis for Biologists*  
532 (Cambridge University Press, Cambridge). 6th Ed.

533 29. Carvalho P, Diniz-Filho JAF, Bini LM (2006) Factors influencing changes in trait  
534 correlations across species after using phylogenetic independent contrasts. *Evol Ecol*  
535 20:591–602.

536  
537  
538
